# Supplementary material for: Forward Genetic Dissection of Biofilm Development by Fusobacterium nucleatum: Novel Functions of Cell Division Proteins FtsX and EnvC
Source: PubMed Central journal article supplement (PMC5915739; doi:10.1128/mbio.00360-18), 2018-04-24
Supplement: mbo002183846sf7.pdf [file mbo002183846sf7.pdf]

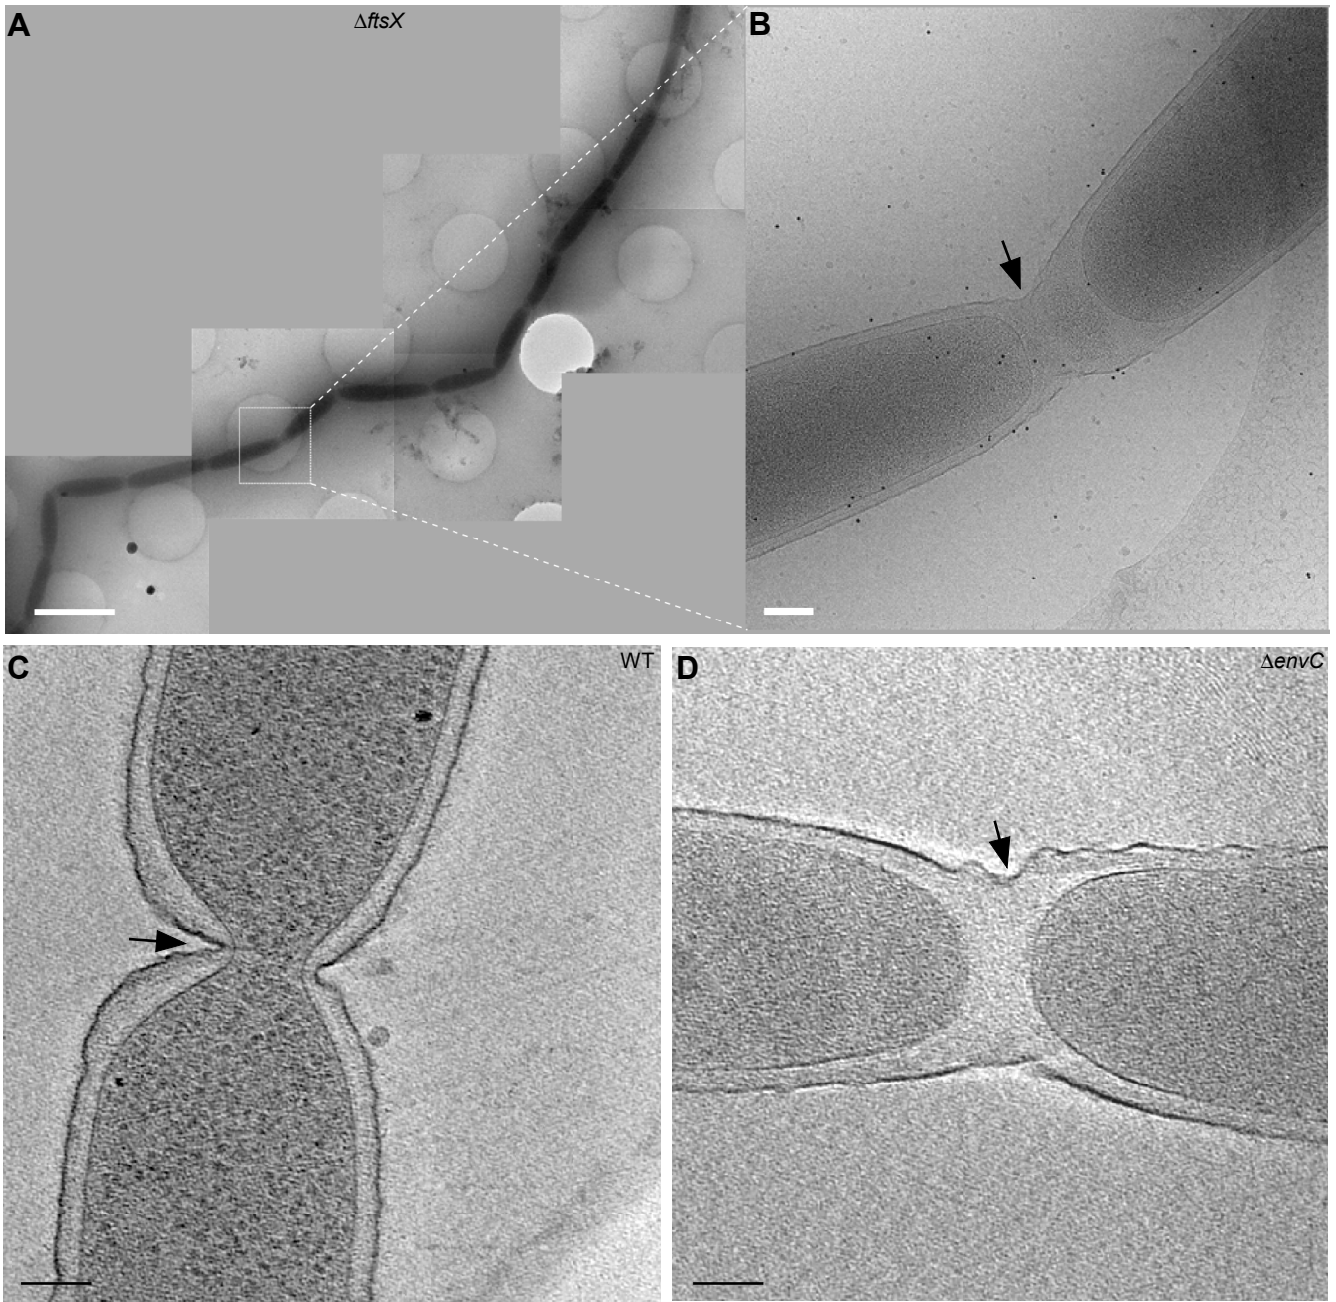

Figure S7: Wu et al.
