# Supplementary material for: Forward Genetic Dissection of Biofilm Development by Fusobacterium nucleatum: Novel Functions of Cell Division Proteins FtsX and EnvC
Source: PubMed Central journal article supplement (PMC5915739; doi:10.1128/mbio.00360-18), 2018-04-24
Supplement: mbo002183846st3.pdf [file mbo002183846st3.pdf]

**Table S3:** Primers used in this study

| Primer      | Sequence <sup>(a)</sup>                                                                                                                       | Used for                          |
|-------------|-----------------------------------------------------------------------------------------------------------------------------------------------|-----------------------------------|
| galK-up-F   | GGCGGAATTCACAATATTAATGATTTAAATAG                                                                                                              | pCWU5-Δgalk                       |
| galK-up-R   | GGCGGGTACCCCAATTAATTCACCTCTACCTGGTGA                                                                                                          | pCWU5-Δgalk                       |
| galK-dn-F   | GGCGGGTACCGCTAGTTTCTATATAGCAAATATTGGAG                                                                                                        | pCWU5-Δgalk                       |
| galK-dn-R   | GGCGTCTAGAAACAGCATCAATATGTCCTGTGATTAAG                                                                                                        | pCWU5-Δgalk                       |
| catP-HS30-F | GGCGAACGTTAGTTATGGAAATAAGACTTAGAAG                                                                                                            | pCWU5                             |
| catP-HS30-R | GGCGAACGTTTTAACTATTTATCAATTCCTGCA                                                                                                             | pCWU5                             |
| Kan215-F    | GGCGCATATGCCAAGCTAGCTTCACGCTGCCGCAAG                                                                                                          | pCWU8                             |
| Kan215-R    | GGCGCATATGCCGCTCAGAAGAACTCGTCAAGAAG                                                                                                           | pCWU8                             |
| P1529-F     | GGCGGTCGACAAAGTTGGATAAATTTAATTTAACTT                                                                                                          | pCWU7                             |
| P1529-R     | GGCGGCTAGCAAATTCAACCTCCCCTTTTTTATATT                                                                                                          | pCWU7                             |
| galK-F      | GGCGGCTAGCATGTTAGAAA ATTTAATAAAAGACTT                                                                                                         | pCWU7                             |
| galK-R      | GGCGAAGCTTTTTATTTACACCTTTCCTGCTCCATCTC                                                                                                        | pCWU7                             |
| rpsJcory-F  | GGCGGAGCTCGCTGCAGAGGTACCAGTCGACACTTAG<br>CAATGGTGTGCAATGTC                                                                                    | pCWU6                             |
| rpsJcory-R  | GGCGCATATGTTATTTATTGCACCTCCTTTAAATTAAC                                                                                                        | pCWU6                             |
| mCherry-F   | GGCGCATATGGTGAGCAAGGGCGAGGAGGAT                                                                                                               | pCWU6                             |
| mCherry-R   | GGCGAAGCTTGAGATCTGCTCGAGAGGATCCCTACTAC<br>TTGTACAGCTCGTCCATG                                                                                  | pCWU6                             |
| PcatP-F     | GGCGGAGCTCAACGAGTGAAAAAGTACTGGTCCCTAG                                                                                                         | pFtsX <sub>FLAG</sub>             |
| PcatP-R     | GGCGGGTACCGTTCCCTCTCAAATTCAAGTTTATCG                                                                                                          | pFtsX <sub>FLAG</sub>             |
| Com-FtsX-F  | GGCGGGTACCATGGAAGAAGATAAAATCTTACATGGAA<br>TTCT                                                                                                | pFtsX <sub>FLAG</sub>             |
| Com-FtsX-R  | AAACTCGAGTTACTTATCATCATCATCCTTATAATCTATA<br>TCATGATCCTTATAATCTCCATCATGATCCTTATAATCAT<br>GATGATGATGATGATGATCTTCATCATCTTCAAACCT CAT             | FtsX <sub>FLAG</sub>              |
| FtsX-F2     | GGCGGGTACCTAAATTTTGA AAAAATGCTAGCATG                                                                                                          | pEnvC <sub>FLAG</sub>             |
| com-EnvC-R  | GGCGCTCGAGTTATTACTTATCATCATCATCCTTATAAT<br>CTATATCATGATCCTTATAATCTCCATCATGATCCTTAAA<br>TCATGATGATGATGATGATGAAATGTTGGTATTGGGTCA<br>ATAGGTCTTAA | pEnvC <sub>FLAG</sub>             |
| RE-envC-F   | GTATCTCATGCAAATTTTAATTCATCAATG                                                                                                                | pEnvC <sub>FLAG</sub>             |
| RE-envC-R   | TCTTCTTTTTAATCTATTTATATAG                                                                                                                     | pEnvC <sub>FLAG</sub>             |
| ftsX-up-F   | GGCGGAGCTCTCAGCATTTCGAGCAAATGATGCAGCA                                                                                                         | pCWU8-ftsX                        |
| ftsX-up-R   | GGCGGGTACCTGAAAATATTTAATGCTACAACTGTAAT                                                                                                        | pCWU8-ftsX                        |
| ftsX-dn-F   | GGCGGGTACCCAGCAAATGTTGGAAGAATTGAATATG                                                                                                         | pCWU8-ftsX                        |
| ftsX-dn-R   | GGCGGTCGACCTAATTTCCCTTTTTTTCAGCTTCTATTTTC                                                                                                     | pCWU8-ftsX                        |
| Re-ECD1-F   | TAAATCTGCAACTATAAAAGAATTAA                                                                                                                    | pFtsX <sub>FLAG</sub> (ΔE<br>CD1) |
| Re-ECD1-R   | GAAGTGTATAAAGATGAATCATATTTAAAG                                                                                                                | pFtsX <sub>FLAG</sub> (ΔE<br>CD1) |
| Re-ECD2-F   | ATTTGCATGAGATACATGTTTTCT                                                                                                                      | pFtsX <sub>FLAG</sub> (ΔE<br>CD2) |
| Re-ECD2-R   | ATTATTTTATGGCATTTTG                                                                                                                           | pFtsX <sub>FLAG</sub> (ΔE<br>CD2) |
| Re-D/E-F    | TTCAATTCTTCCAACATTTGCTGG                                                                                                                      | pFtsX <sub>FLAG</sub> (ΔD/<br>E)  |

|           |                                                     |                                       |
|-----------|-----------------------------------------------------|---------------------------------------|
| Re-D/E-R  | TAAGACAATTTTAGTATTTTTCTTTTATCAG                     | pFtsX <sub>FLAG</sub> ( $\Delta$ D/E) |
| envC-up-F | GGCGGAGCTCATGAAAAAATTTTTATTATT AGCAGTAT             | pCWU8-envC                            |
| envC-up-R | GGCGGGTACCTCTAATTTAG AAGTTTCTGT ATCTATTG            | pCWU8-envC                            |
| envC-dn-F | GGCGGGTACCTTTATGCTGA TAAATTCCAA GGCTTGG             | pCWU8-envC                            |
| envC-dn-R | GGCGGTCGACCTTTCAATAT TCTCTATTTTAGAGTCAAT            | pCWU8-envC                            |
| ppnk-up-F | GGCGGGATCCTTTAGAAA ACATGTATCTCATGCAAATT             | pCWU8-ppnk                            |
| ppnk-up-R | GGCGGGTACCTCCGCCTATAACAACACTATATATTCAG              | pCWU8-ppnk                            |
| ppnk-dn-F | GGCGGGTACCAAGATGAAGTAGAAATTTCTTACTCAA               | pCWU8-ppnk                            |
| ppnk-dn-R | GGCGAAGCTTTTATACCTCATTAAACATTTTATTTGCT              | pCWU8-ppnk                            |
| amiD3-upF | GGCGGGTACCTTGCTAAAGAAATATTATTTTTAAAG                | pCWU8-amiD3                           |
| amiD3-upR | GGCGGGTACCAACACTATCTTTTGATTTATCTATTATT              | pCWU8-amiD3                           |
| amiD3-dnF | GGCGGGTACCATATTGCAGATAGATTAGAGATGAG                 | pCWU8-amiD3                           |
| amiD3-dnR | GGCGAAGCTTTTCCAGAAGCTTCTGTCTTTGGAECTCT              | pCWU8-amiD3                           |
| rpsJ-F    | GGCGGAGCTCGTTTTTTCTAAGTCAATTTCAAATTCAG              | pMinC                                 |
| rpsJR     | AAAAGGTACCTGCACCTCCTTTAAATTAACACTACAT               | pMinC                                 |
| minC-F    | GGCGGGTACCGGGAGGTAAATATGAGCAACCATGTAA<br>TAATAAAAGG | pMinC                                 |
| minC-R    | GGCGCTCGAGTTATATCAACTCCTCAACAACACTATTTCTT           | pMinC                                 |
| RT-ftsX-F | AGCAATCTAAGGAACAAGGTTT                              | RT-PCR <i>ftsX</i>                    |
| RT-ftsX-R | TCAAGTCCTGTATTGGCATTAT                              | RT-PCR <i>ftsX</i>                    |
| RT-16s-F  | GGTTAAGTCCCGCAACGA                                  | RT-PCR <i>16s</i>                     |
| RT-16s-R  | CATCCCCACCTTCCTCCTAC                                | RT-PCR <i>16s</i>                     |

<sup>(a)</sup>Underlined are the restriction sites in the primers.
